# Supplementary material
Source: Research Square preprint supplement (doi:10.21203/rs.3.rs-9696264/v1)
Supplement: Supplementary file 1 [file 73be777535b42ebea45c0ba1.xlsx]

## Sheet: Sheet1
Signalment of dogs
Dog no.	Age, mo	Sex	Body weight,kg	Incidental findings	CSF test	Spinal diagnosis
1	70	F*	9.3	Brain tumor (oligodendroglioma)	NE	TL-IVDD
2	43	M§	13.3	NA	NE	TL-IVDD
3	80	M§	14.8	MEE	NE	TL-IVDD
4	89	M§	14.7	MEE	NE	C-IVDD
5	35	M	10.3	NA	NE	C-IVDD
6	69	M§	11.4	MEE	NE	Spinal arachnoid diverticulum
7	122	F*	8.2	MEE	NE	Spinal tumor (oligodendroglioma)
8	55	M§	13.9	MEE	NE	TL-IVDD
9	92	F*	9.1	NA	NE	C-IVDD
10	47	M§	12.9	MEE	NE	C-IVDD
11	84	M§	10.4	MEE	NE	C-IVDD
12	32	F	9.8	NA	Abnormality	MUO
13	91	F	10.6	Microinfarct	NA	TL-IVDD
14	67	F	11.5	MEE	NE	TL-IVDD
15	14	M§	12.9	NA	NE	TL-IVDD
16	50	F*	8.6	NA	NE	C-IVDD
17	45	M§	15.3	NA	NE	C-IVDD
18	154	M§	15.2	Cyst of the sella turcica	NE	TL-IVDD
19	119	F*	9.5	MEE	NE	TL-IVDD
20	95	M§	10.4	NA	NA	C-IVDD
